1 **Changes to an intensive care unit *Acinetobacter baumannii* population following**  
2 **COVID-19 disruptions and targeted infection prevention interventions.**

3

4 Haiyang Liu<sup>1,2\*</sup>, Robert A. Moran<sup>3\*</sup>, Emma L. Doughty<sup>3</sup>, Xiaoting Hua<sup>4,5</sup>, Ann E. Snaith<sup>3</sup>,  
5 Linghong Zhang<sup>4,5</sup>, Xiangping Chen<sup>6</sup>, Feng Guo<sup>6</sup>, Willem van Schaik<sup>3</sup>, Alan McNally<sup>3^</sup>,  
6 Yunsong Yu<sup>1,4^</sup>

7

8 <sup>1</sup>Centre of Laboratory Medicine, Zhejiang Provincial People's Hospital, People's Hospital of  
9 Hangzhou Medical College, 158 Shangtang Road, Hangzhou, Zhejiang 310014, China

10 <sup>2</sup>Zhejiang University School of Medicine, Hangzhou, Zhejiang, 310016, China

11 <sup>3</sup>Institute of Microbiology and Infection, College of Medical and Dental Sciences, University  
12 of Birmingham, Birmingham, UK

13 <sup>4</sup>Department of Infectious Diseases, Sir Run Run Shaw Hospital, Zhejiang University School  
14 of Medicine, Hangzhou, Zhejiang, 310016, China

15 <sup>5</sup>Key Laboratory of Microbial Technology and Bioinformatics of Zhejiang Province,  
16 Hangzhou, Zhejiang, 310016, China

17 <sup>6</sup>Intensive Care Unit, Sir Run Run Shaw Hospital, Zhejiang University School of Medicine,  
18 Hangzhou, Zhejiang, 310016, China

19

20 \* Authors contributed equally

21 ^ Co-corresponding authors:

22 Alan McNally, Institute of Microbiology and Infection, College of Medical and Dental  
23 Sciences, University of Birmingham, Birmingham, UK, a.mcnally.1@bham.ac.uk

24 Yunsong Yu, Department of Infectious Diseases, Sir Run Run Shaw Hospital, Zhejiang  
25 University School of Medicine, Hangzhou, Zhejiang, 310016, China. yvys119@zju.edu.cn;

26 Tel: +86 0571 8609 0073

27

28 **Keywords:** Carbapenem-resistant *Acinetobacter baumannii*, Intensive Care, Genomic

29 Epidemiology, Infection Prevention and Control, Antimicrobial Resistance.

## 30 **Abstract**

31 Carbapenem-resistant *Acinetobacter baumannii* (CRAB) is a persistent nosocomial pathogen  
32 that poses a significant threat to global public health. A three-month cross-sectional  
33 observational study was conducted in a 28-bed ICU in Hangzhou, China. The same ICU was  
34 sampled for the same duration and with a similar methodology in 2019, 20 months prior to  
35 the outset of this study. Following COVID-19-associated delays, a series of IPC measures  
36 targeting patients, staff and the ICU environment were implemented for 8 months prior to and  
37 throughout this study. A total of 5,341 samples were collected from the ICU environment (n  
38 = 4450) and patients (n = 891). *A. baumannii* isolates were obtained from 9.5% of these  
39 samples (n = 505). Most *A. baumannii* isolated in this ICU were CRAB (419/518; 80.9%).  
40 Fewer CRAB were isolated here (407 from 363 sampling occasions) than in 2019 (502 from  
41 336 sampling occasions). However, MIC<sub>50</sub>/MIC<sub>90</sub> values for imipenem increased from 32/64  
42 mg/L in the 2019 study to 64/128 mg/L here. This was accompanied by the proportion of  
43 global clone 2 (GC2) isolates falling from 99.5% in 2019 to 50.8% (213/419) in 2021. The  
44 phylogenetic diversity of GC2 increased, apparently driven by regular introductions of  
45 distinct clusters in association with patients. The remaining CRAB (40.2%; 206/419) were a  
46 highly clonal population of ST164, which appears to have persisted in the ICU since an  
47 introduction in mid-2020. We found clusters of GC2 and ST164 isolates with identical core  
48 genomes in different room or bed unit environments, and in multiple patients, indicative of  
49 transmission in the ICU.

50 Changes to IPC procedures in this ICU were associated with a reduction in the total  
51 prevalence of CRAB, and in the number of CRAB isolated from clinical specimens. At the  
52 phenotypic level, the CRAB population exhibited increased resistance to carbapenems, and  
53 this may be the result of increased antibiotic prescribing over the COVID-19 period. The  
54 increased diversity of this CRAB population appears to have been the result of repeated

55 introductions to the ICU with patients, which have continued despite interventions.

## 56 **Introduction**

57

58 *Acinetobacter baumannii* is a Gram-negative bacterial pathogen that causes ventilator-  
59 associated pneumonia and bloodstream infections in critically ill hospital patients globally.<sup>1,2</sup>

60 The morbidity and mortality associated with *A. baumannii* infections are exacerbated by its  
61 extensive resistance to antibiotics. Carbapenem-resistant *A. baumannii* (CRAB) are often  
62 only sensitive to tigecycline and polymyxins,<sup>3</sup> and can persist in hospital environments and  
63 patients for extended periods.<sup>1</sup> Resolving CRAB outbreaks can require modifications to  
64 practice and infrastructure that impose significant clinical, logistical, and financial costs.<sup>4</sup> In  
65 2018, the World Health Organisation declared CRAB a priority organism for which novel  
66 therapeutics are urgently required.<sup>5</sup>

67

68 Given the limited options for antimicrobial chemotherapy, infection prevention and control  
69 (IPC) strategies must play a substantial role in limiting the impact of CRAB in hospitals.<sup>6</sup>  
70 Effective genomic surveillance has the capacity to inform IPC approaches by defining  
71 outbreaks and identifying sources and pathways for bacterial transmission. Recent hospital  
72 studies have demonstrated the utility of whole-genome sequencing (WGS) for high-resolution  
73 characterisation of *A. baumannii* outbreaks or persistent populations.<sup>6-9</sup> The crucial need to  
74 develop a thorough understanding of the longer-term persistence, transmission and evolution  
75 of CRAB populations in nosocomial environments provided the motivation for undertaking  
76 this study.

77

78 In August-October 2019, we conducted a 13-week genomic surveillance study of CRAB in a  
79 28-bed intensive care unit (ICU) located in Hangzhou, China.<sup>10</sup> We found that the ICU

80 CRAB population was dominated by representatives of global clone 2 (GC2), which is one  
81 of two clones that account for the majority of CRAB globally.<sup>3</sup> Consistent with global  
82 reports, carbapenem resistance in this GC2 population was conferred by the *bla*<sub>OXA-23</sub>  
83 carbapenemase gene, which was present in composite transposons Tn2006 or Tn2009  
84 inserted at several different chromosomal sites.<sup>10</sup> Comparative analyses revealed that the GC2  
85 population in this ICU was phylogenetically diverse, and the diversity appeared to have been  
86 shaped by independent introductions of multiple distinct GC2 clusters to the ICU. We  
87 detected putative CRAB transmission events between bed units and rooms within the ICU,  
88 and the spatiotemporal co-location of diverse CRAB clusters facilitated three horizontal gene  
89 transfer events over the course of the study.<sup>10</sup>

90

91 Informed by that first study, we planned to implement a set of IPC interventions, then  
92 perform a follow-up study to evaluate their effectiveness in reducing the prevalence of CRAB  
93 in the ICU. However, ICU operations were interrupted by the outbreak of COVID-19 in early  
94 2020, and access to the ICU was restricted. Consequently, the implementation of planned  
95 CRAB-focused interventions was delayed until September 2020. Once introduced, the suite  
96 of interventions targeted ICU patients, the ICU environment (including equipment and sinks),  
97 and ICU staff (Table S1). Full access to the ICU was restored in late November 2020,  
98 enabling us to conduct a second high-resolution genomic surveillance study, with a  
99 methodology identical to that of our pre-COVID-19 pandemic study, in May-July 2021.

100

101 Here we describe the follow-up cross-sectional observational study of *A. baumannii* in this  
102 Hangzhou ICU. Over a 13-week period, we applied a deep-sampling approach to ICU  
103 patients and the ICU environment. All *A. baumannii* isolates were whole-genome sequenced.  
104 The structure and dynamics of this population were compared to those from our original

105 study to evaluate the population’s longer-term development, and its response to IPC  
106 interventions.

107

## 108 **Methods**

109

### 110 **Consent and research ethics**

111 Ethical approval and informed consent were obtained by the Sir Run Run Shaw Hospital  
112 (SRRSH) Zhejiang University local ethics committee (approval number 20190802-1). This  
113 work was part of a study registered as a clinical trial with ClinicalTrials.gov (NCT04310722).

114

### 115 **IPC interventions implemented before this study**

116 A bundled set of interventions that aimed to address the abundance of CRAB in this ICU  
117 were implemented 8 months prior to the outset of this study. The interventions included  
118 changes to daily practice in the ICU, alongside raising staff awareness around the issue. The  
119 interventions are listed in Table S1. Briefly, patient care was modified by introducing “water-  
120 free” cleaning methods and by installing disinfection devices for liquid waste. ICU sinks  
121 ceased operation. Environmental cleaning was performed more regularly, with particular  
122 attention paid to end-of-stay cleaning procedures and communal surfaces such as keyboards  
123 used routinely by ICU staff. Education for staff was enhanced, and enforcement of hand  
124 hygiene practices was targeted through compliance monitoring and the introduction of a  
125 compliance management system.

126

### 127 **Study design and sample collection**

128 This cross-sectional observational study was conducted in a 28-bed ICU in SRRSH,  
129 Hangzhou, China from May to July 2021. A map of the ICU is presented in Figure S1. Unless

130 sampling was perceived to be medically detrimental, ICU patient sampling was planned for  
131 the beginning of the study or on admission to the ward and weekly thereafter. Patient samples  
132 were routinely collected from oral and rectal swabs, and from nasogastric, nasojejunal,  
133 endotracheal, or tracheostomy tube swabs when present. Clinical samples were obtained from  
134 patients as part of normal medical practice, and all *A. baumannii* obtained from clinical  
135 samples over the study period were retained. Equipment, sinks and other surfaces within  
136 patient rooms were swabbed weekly. Equipment, surfaces, and sinks in communal areas  
137 outside patient rooms were sampled monthly.

138

### 139 **Sample processing and DNA sequencing**

140 Environmental surfaces (approximately 10 x 10 cm) were swabbed with sterile swabs  
141 (COPAN, Italy) pre-moistened with 2 mL TSB supplemented with 0.1% sodium thiosulfate  
142 (Sangon Biotech, China). The swabs were immediately placed into 14-mL sterile tubes  
143 containing 2 mL TSB with 0.1% sodium thiosulfate then incubated for 24 hours at 37°C.  
144 After culture, 20 µL overnight bacteria were streaked onto Acinetobacter CHROMagar plates  
145 (CHROMagar, Paris, France) followed by overnight incubation at 37°C.

146

147 For patient samples, rectal swabs containing Cary-Blair Transport Medium (Gongdong,  
148 Taizhou, China) were used and other swabs were moistened using 0.9% saline before  
149 sampling. These swabs were plated directly onto Acinetobacter CHROMagar plates and  
150 incubated at 37°C for 24 hours. Based on red colour and morphology, a single, isolated  
151 colony of presumptive *A. baumannii* was selected and streaked onto a Mueller-Hinton (MH)  
152 agar plate (Oxoid, Hampshire, UK), then incubated again at 37°C for 24 hours. A single,  
153 isolated colony from the MH plate was selected and stored for downstream analyses.

154

155 Species identification was confirmed using Matrix-assisted laser desorption ionization-time  
156 of flight mass spectrometry (MALDI-TOF MS) (bioMérieux, France) and 16S rRNA gene  
157 sequencing using the primers 27F-5'- AGAGTTTGATCCTGGCTCAG -3' and 1492R-5'-  
158 GGTTACCTTGTTACGACTT -3'.

159

### 160 **Antimicrobial susceptibility profiling**

161 Minimum inhibitory concentrations (MICs) of meropenem, imipenem, polymixin B,  
162 tigecycline, cefoperazone/sulbactam (1:1), cefoperazone/sulbactam (2:1), sulbactam,  
163 amikacin and ciprofloxacin were measured using the broth microdilution method of plate for  
164 “Susceptibility testing of non-fastidious Gram Negative isolates”. Results were interpreted  
165 according to the Clinical and Laboratory Standards Institute 2021 guidelines and European  
166 Committee on Antimicrobial Susceptibility Testing (EUCAST) 2023 breakpoint tables  
167 ([http://www.eucast.org/clinical\\_breakpoints/](http://www.eucast.org/clinical_breakpoints/)) for polymyxin B (S:  $\leq 2$  mg/L, R:  $>2$  mg/L).

168 Tigecycline results were interpreted based on Food and Drug Administration (FDA)  
169 guidelines. *Escherichia coli* ATCC 25922 was used as the quality control strain.

170

### 171 **Illumina sequencing**

172 Collected isolates were subjected to Illumina sequencing. One colony of each isolate was  
173 cultured in 2 mL Mueller-Hinton broth (Oxoid, UK) for 24 hours at 37°C. Cell pellets were  
174 harvested and DNA was isolated using the Qiagen Mini Kit (Qiagen, Germany). The quality  
175 and quantity of DNA were assessed using a NanoDrop 2000 (Thermo Scientific, USA) and  
176 Qubit 4.0 fluorometer (Invitrogen, USA).

177

178 Libraries were prepared using the TruePrep™ DNA Library Prep Kit V2 (Vazyme)  
179 according to the manufacturer’s protocol. Individual libraries were assessed on the QIAxcel



180 Advanced Automatic nucleic acid analyzer using a high-resolution gel cartridge (Qiagen,  
181 Germany), and then were quantified by qPCR using the use of KAPA SYBR FAST qPCR  
182 Kits Kapa KK4610 (KAPA Biosystem, Wilmington, MA, U.S.A.). Paired-end sequencing  
183 (2×150-bp reads) was performed on the Illumina HiSeq X Ten platform (Illumina Inc., San  
184 Diego, CA, USA).

185

### 186 **Oxford Nanopore sequencing**

187 Long-read sequencing was performed for 60 isolates chosen after Illumina sequencing on the  
188 basis of phylogenetic, resistance gene and plasmid diversity. Genomic DNA was extracted  
189 using the Gentra® Puregene® Yeast/Bact. Kit (Qiagen, Germany) according to the  
190 manufacturer's protocol with minor modifications. Briefly, cell pellets were harvested in a  
191 sterile 15 mL falcon tube from 5mL overnight culture. Each pellet was resuspended in 500  
192 µL Lysis Buffer Solution, transferred to a Phase Lock tube and incubated at 37°C for 30  
193 minutes. Cell lysates were treated with 2 µL RNase A (100 mg/mL, Qiagen, Germany),  
194 gently mixed by flicking the tube and incubated at 37°C for 30 minutes. The cell lysate was  
195 further treated with 3 µL Proteinase K (Qiagen, Germany), mixed by gentle inversion and  
196 incubated at 50°C for 90 minutes. The suspension was mixed with 500 µL  
197 phenol:chloroform:isoamyl alcohol (25:24:1) by inversion and centrifuged at 20,000 rcf for  
198 10 minutes. The supernatant was collected and DNA was purified using AMPure XP beads  
199 (Beckman Coulter™) with minor modifications to the manufacturer's protocol: 70% ethanol  
200 was used for washing the DNA on the beads before incubation at 37°C for 5 min to dry off  
201 residual ethanol. The DNA was resuspended in 150 µL of nuclease-free water. The quality  
202 and quantity of DNA were assessed as described above.

203

204 Oxford Nanopore sequencing libraries were prepared using the SQU-LSK109 Ligation  
205 Sequencing Kit (Oxford Nanopore Technologies, UK) in conjunction with the PCR-Free  
206 ONT EXP-NBD104 Native Barcode Expansion Kit (Oxford Nanopore Technologies, UK)  
207 according to the native barcoding genomic DNA protocol. DNA was processed without the  
208 optional shearing steps to select for long reads. After quantification of the individual libraries  
209 by Qubit and normalisation of library concentrations, the library was sequenced on the  
210 GridION X5 platform (Oxford Nanopore Technologies, UK).  
211 Raw Illumina and Minion sequence data for all isolates is available via National Center for  
212 Biotechnology Information under BioProject accession PRJNA1034534.

213

#### 214 **Bioinformatic analyses**

215 Sequence reads were trimmed, assembled and assessed for quality. MLST  
216 (<https://github.com/tseemann/mlst>) was used to determine multi-locus sequence types with  
217 the Pasteur and Oxford typing schemes.<sup>11,12</sup> Typing of capsular polysaccharide (KL) and  
218 lipooligosaccharide outer core (OCL) synthesis loci was conducted with Kaptive.<sup>13</sup>  
219 AMRFinder was used to identify antimicrobial resistance genes.<sup>14</sup> Plasmid replicons were  
220 typed using the Hamidian lab typing scheme.<sup>15</sup>

221

222 Snippy v4.4.5 (<https://github.com/tseemann/snippy>) was used to align Illumina reads against  
223 a corresponding reference hybrid assembly and generate a core genome alignment.  
224 Polymorphic sites were extracted with Gubbins v2.4.0 excluding those that were predicted to  
225 occur via recombination.<sup>16</sup> Phylogenies were constructed from these polymorphic sites using  
226 IQtree v2.0.3. Divergence dating was undertaken with the least-squares method implemented  
227 by IQTree v2.0.3, using the previously generated tree, Gubbins fasta file, and a GTR+G  
228 model.<sup>17,18</sup> SNP-distances were calculated from the Gubbins-filtered polymorphic sites file

229 using SNP-dists 0.6.3 (<https://github.com/tseemann/snp-dists>).

230

## 231 **Results**

232

### 233 ***A. baumannii* infections were rare despite high abundance in patients and bed units**

234 A total of 131 patients (79 male; 52 female; median age 68 years; interquartile range [IQR] =  
235 55.5 – 77.5) were sampled over the three-month study period (Table S2). The median length  
236 of patient stay, from admission to discharge or the end of the study, was 10 days (IQR: 5 –  
237 21.5 days). Most patients (53.4%) were in the ICU for  $\leq 10$  days, but 17.1% were present for  
238  $>31$  days. Samples were taken each Tuesday, and patients were screened within the first 48  
239 hours after admission when possible. “Bed units”, defined as the environmental sites of each  
240 bed and its associated equipment, were sampled on 363/364 (99.7%) planned sampling  
241 occasions, as one patient was undergoing bedside surgery on a single planned sampling  
242 occasion. Patients were sampled on 303/346 (87.6%) planned occasions.

243

244 A total of 5,341 samples were collected from patients and environmental sites. *A. baumannii*  
245 was isolated from 505 samples: 382/4450 (8.6%) environmental samples and 123/891  
246 (13.8%) patient samples. Bed units yielded more environmental isolates (374/4317, 8.7%)  
247 than communal areas outside bed units (8/133 samples, 6.0%). Within bed units, ventilators  
248 (56/281 samples, 19.9%) and ventilator shelves (40/275 samples, 14.6%) yielded the most *A.*  
249 *baumannii*. Of the 131 patients screened, 41.2% (54/131) were *A. baumannii*-positive on at  
250 least one sampling occasion, with most of the positive samples originating from nasogastric  
251 tube (33/174, 19.0%) or oral (40/220, 18.2%) swabs. A set of 13 isolates obtained from  
252 diagnostic clinical specimens were collected from 10 patients over the study period; one from  
253 an abdominal excision exudate and 12 from sputum.

254

255 **Most ICU *A. baumannii* were carbapenem-resistant**

256 Over the study period, 19.1% (25/131) of ICU patients were treated with the carbapenems  
257 imipenem, meropenem, or ertapenem. MIC testing of all 520 *A. baumannii* in this collection  
258 revealed that the rates of resistance to both imipenem and meropenem were 80.9% (419/518)  
259 (Figure S2). A larger proportion of patient isolates (116/123; 94.3%) were CRAB than  
260 environmental isolates (303/382; 79.3%). The  $\beta$ -lactam/ $\beta$ -lactamase inhibitor combinations  
261 cefoperazone/sulbactam and piperacillin/tazobactam were administered to 14.5% (19/131)  
262 and 40.5% (53/131) of patients, respectively. The resistance rates to these combinations were  
263 80.3% (416/518) for cefoperazone-sulbactam (1:1) and 81.1% (420/518) for cefoperazone-  
264 sulbactam (2:1). Resistance rates to sulbactam alone, ciprofloxacin, and amikacin were  
265 80.9% (419/518), 80.9% (419/518), and 23.0% (119/518), respectively. All isolates were  
266 sensitive to colistin and to tigecycline.

267

268 To quantify levels of carbapenem resistance in the CRAB populations from before and after  
269 the intervention period, we compared the imipenem MICs that would be sufficient to inhibit  
270 50% (MIC<sub>50</sub>) and 90% (MIC<sub>90</sub>) of all isolates in each collection. For the 419 CRAB isolated  
271 in this study, the MIC<sub>50</sub> and MIC<sub>90</sub> to imipenem were 64 mg/L and 128 mg/L, respectively.  
272 The imipenem MIC<sub>50</sub>/MIC<sub>90</sub> values for the 551 CRAB isolated in our first study were 32  
273 mg/L and 64 mg/L, respectively. This data reflects an increase in carbapenem resistance  
274 levels in this ICU between 2019 and 2021. However, total sensitivity to colistin and  
275 tigecycline remained consistent across study periods.

276

277 **Whole-genome sequencing revealed shifts in the circulating CRAB population**

278 All *A. baumannii* isolates were whole-genome sequenced (Table S3). Genome sequence data  
279 revealed that the population included representatives of 35 different sequence types according  
280 to the Pasteur MLST scheme (Figure 1A). Most of the diversity was seen amongst the  
281 carbapenem-sensitive population, which included isolates from 33 different STs, 20 of which  
282 were represented by a single isolate each. Only three of these STs were represented by ten or  
283 more isolates: ST240, ST40, and ST221. The carbapenem-resistant population was comprised  
284 of just two sequence types: ST2/GC2 (213 isolates; 50.8%) and ST164 (206 isolates; 49.2%).  
285 The presence of ST164, accounting for approximately half of the CRAB isolates in this study,  
286 represents a major shift from 2019, where the CRAB population was dominated by GC2  
287 (548/551; 99.5%) (Figure 1A). ST164 isolates were obtained from clinical specimens in this  
288 ICU earlier in 2021,<sup>19</sup> and this ST has recently been declared an international clone (IC11),  
289 with reports of human infections in Europe, Asia, Africa and the Middle East.<sup>20</sup> Imipenem  
290 MIC<sub>50</sub>/MIC<sub>90</sub> values for the 206 ST164 isolates were 128/128 mg/L, and 32/64 mg/L for the  
291 213 GC isolates, indicating that the appearance of ST164 was responsible for the overall  
292 increase in carbapenem resistance between studies.

293

294 GC2 and ST164 were isolated throughout the study period and across the ICU (Figure 1). On  
295 37/364 (10.2%) sampling occasions, GC2 and ST164 were isolated from the same bed unit.  
296 Despite their near-even prevalence in the ICU environment and patients, GC2 strikingly  
297 accounted for 12/13 (92.3%) clinical isolates obtained over the study period, with the  
298 remaining sputum isolate belonging to ST164. In contrast to GC2 and ST164, carbapenem-  
299 sensitive (CSAB) STs appeared sporadically over the course of the study and were generally  
300 localised to a single room, patient or time point (Figure S3).

301

302 **The GC2 population shifted significantly between studies through the introduction of**  
303 **multiple discrete sub-clusters**

304 Consistent with our first study, carbapenem-resistance in GC2 CRAB isolates was conferred  
305 by the carbapenemase gene *bla*<sub>OXA-23</sub>. To determine the genomic contexts of these *bla*<sub>OXA-23</sub>  
306 genes, we examined 19 hybrid-assembled complete GC2 genomes, and screened the  
307 collection of 213 GC2 draft genomes with signature sequences indicative of the Tn2006 or  
308 Tn2009 insertions identified in our first study.<sup>10</sup> This revealed that the chromosomal positions  
309 encountered in the first study accounted for *bla*<sub>OXA-23</sub> carriage in all GC2 isolates collected  
310 here (Figure 2A; Table S3). Additionally, one hybrid-assembled genome (DETAB-E2110)  
311 contained two copies of Tn2006, with the second copy found in the 13,545 bp plasmid  
312 pDETAB10::Tn2006 (Figure S4). pDETAB10::Tn2006 was generated by the insertion of  
313 Tn2006 into the backbone of the 8,731 bp R2-T1 type plasmid pDETAB10, which was  
314 present in 75/547 (13.7%) GC2 isolates in our first study and 175/213 (82.2%) GC2 isolates  
315 here. Screening this collection with the signatures of this insertion revealed that  
316 pDETAB10::Tn2006 was not present in any other isolates. DETAB-E2110 had MIC values of  
317 128 mg/L and >128 mg/L for imipenem and meropenem, which were the equal-highest  
318 observed in this collection.

319

320 Although the GC2 isolates collected here shared Tn2006/Tn2009 insertions with the GC2  
321 clusters examined in our previous study, chromosomal segments that contain transposons can  
322 be exchanged by homologous recombination between distinct *A. baumannii* strains,<sup>21</sup> so we  
323 sought phylogenetic evidence to assess cluster persistence in this ICU. To determine whether  
324 the GC2 population observed in this study was derived from that present in 2019, we  
325 constructed a phylogeny from the GC2 genomes obtained here, along with representative  
326 genomes for each of the 17 GC2 clusters identified in our first study (Figure 2A). The

327 phylogeny featured three large clusters that included 49, 72 and 92 GC2 genomes from this  
328 study. Representatives of 16 GC2 clusters from the 2019 study were confined to the diverse  
329 central cluster, with a single representative present in one of the two more clonal clusters,  
330 cluster 24 (C24) (Figure 2A). Within the diverse central cluster, representatives from study 1  
331 were largely distinct from isolates collected here, with the exception of C16, which differed  
332 from isolate DETAB-P494 by just one core-gene SNP (cgSNP). Overall the GC2 population  
333 was more diverse in 2021 than it was in 2019, which is consistent with frequent and ongoing  
334 introductions of distinct GC2 clusters to the ICU. Further supporting this, some GC2 clusters  
335 appeared briefly in the ICU, and were present for no more than three sampling weeks (Figure  
336 2B). These will be referred to as transient GC2 clusters.

337

338 To detect putative patient-associated introductions to the ICU over the course of this study,  
339 we identified instances where, apart from in week 1, the first isolates of transient GC2  
340 clusters appeared in patient samples. We found six such instances, involving six different  
341 clusters (Figure 2C). Within transient clusters, isolates differed by 0-4 cgSNPs. C22 was  
342 represented by a single patient isolate, but isolates of the other five clusters were found in two  
343 or more different environments each. These included the bed units occupied by the patients  
344 that initially carried the clusters, and either bed units within the same rooms (C18, C19, C21),  
345 bed units in different rooms (C23), or a communal cleaning cart (C20) (Figure 2C). C19 and  
346 C21 were carried by two patients each, and the second patient that each cluster was isolated  
347 from most parsimoniously acquired C19/C21 from their contaminated room environments.  
348 All six transient GC2 clusters that first appeared in patient samples disappeared from the ICU  
349 following the departure of the last patient that carried them (Figure 2C).

350

351 The largest GC2 clusters, C24 and C25, were present in most (10/13 for C24) or all (13/13  
352 for C25) study weeks (Figure 2B). The largest cluster, C25, only contained genomes from  
353 this study, all of which differed from one another by 0-6 cgSNPs (Table S4). Isolates in C24  
354 differed from one another by 0-11 cgSNPs, and from the study 1 representative C2 genome  
355 by 5-10 cgSNPs (Table S4). As representatives of C24 and C25 were already present in the  
356 first week of this study (Figure 2B), we did not capture their introductions to the ICU, so  
357 cannot determine whether they were introduced in single or multiple events. However, the  
358 presence of sub-clusters of C24 and C25, containing isolates that do not differ at the cgSNP  
359 level (0 cgSNPs) but were found in multiple bed units or rooms, is evidence for the ongoing  
360 transmission of C24 and C25 within the ICU.

361

#### 362 **ST164: A dominant new strain type recently introduced but fully established in the ICU**

363 ST164 was not detected in this ICU in our first study. It was therefore important to establish  
364 whether this lineage had been introduced recently or had persisted in the ICU for an extended  
365 period. To assess their structural diversity, eight ST164 isolates were hybrid-sequenced to  
366 generate complete genomes. All eight complete genomes consisted of a 3.9 Mbp  
367 chromosome and five plasmids, pDETEC17 to pDETEC21, that ranged from 12,790 bp to  
368 2,309 bp (Figure 3A). Screening the entire collection of 206 ST164 short-read assemblies  
369 revealed that the five plasmids were present in almost all ST164 isolates (pDETAB19  
370 195/206; pDETAB17 201/206; others 206/206).

371

372 All ST164 genomes contained five acquired antibiotic resistance genes (ARGs). Four of these  
373 encoded beta-lactamases: *bla*<sub>NDM-1</sub>, *bla*<sub>OXA-23</sub>, *bla*<sub>CARB-16</sub> and *ampC* (also called *bla*<sub>ADC</sub>). In the  
374 complete ST164 genomes, all ARGs were located in the chromosome (Figure 3A). The  
375 *bla*<sub>NDM-1</sub> gene was in the complex transposon Tn6924,<sup>22</sup> along with the bleomycin resistance



376 gene *ble*<sub>MBL</sub> and the aminoglycoside resistance gene *aphA6*. The remaining beta-lactamase  
377 genes were in four IS*Abal* composite transposons: *bla*<sub>OXA-23</sub> in two copies of Tn2006, *ampC*  
378 in Tn6168, and *bla*<sub>CARB-16</sub> in a novel transposon named Tn7735 (Figure 3A). Screening draft  
379 genomes with the junction sequences associated with all five ARG-containing insertions  
380 revealed that they were totally conserved across this ST164 population.

381

382 The near-total conservation of mobile genetic elements and chromosomal insertion sites  
383 suggested that the ST164 population in this ICU was highly clonal. To confirm this, we  
384 determined cgSNPs between all isolates in this collection and found that they ranged from 0-  
385 21. We did not find evidence for the introduction of ST164 clusters with patients over the  
386 course of this study, and we were aware that the same ST had been isolated from a sputum  
387 specimen collected in this ICU in January 2021,<sup>19</sup> four months prior to this study. We  
388 therefore used the genome of that clinical isolate, DETAB-R21, as a reference for a time-  
389 dated phylogeny for the genomes generated here (Figure 3B). The time-dated phylogeny was  
390 consistent with this ST164 population having diversified from an initial introduction to the  
391 ICU in mid-2020. The two deepest branches in this phylogeny had estimated dates of  
392 divergence from a common ancestor in April 2020, giving rise to clusters 164-A and 164-B  
393 (Figure 3B). DETAB-R21 clustered with 164-B. Both 164-A and 164-B were present in the  
394 first and last weeks of this study, but were not present in every intervening week, with no  
395 164-A isolates in week 11 and no 164-B in weeks 3 and 12 (Figure 4). Clusters 164-C  
396 (present in weeks 5-13) and 164-D (weeks 2, 5-10), emerged from 164-A and 164-B,  
397 respectively (Figure 3B), and were not present in the ICU at the outset of the study (Figure  
398 4). Notably, the first isolates of 164-C and 164-D were derived from environmental samples  
399 rather than patient samples, consistent with their emergence from an existing ICU population  
400 rather than from patient-associated introductions.

401

402 Over the course of the study, we observed 10 clear instances where patients were admitted to  
403 the ICU, were *A. baumannii*-negative at one or more sampling points, but then yielded ST164  
404 from subsequent oral, rectal or tube swabs. In all such cases, patient-derived ST164 isolates  
405 were identical (0 cgSNPs; Table S5) to one or more isolates that had previously been  
406 obtained from the ICU environment or other ICU patients. We conclude that these events  
407 represent acquisition of ST164 from the persistent ICU population. Acquisition events  
408 involved three of the four ST164 phylogenetic clusters: ST164-A in 3/10 cases, ST164-B in  
409 4/10, and ST164-C in 3/10. In one further case, a patient that produced GC2 from their first  
410 screening samples appeared to acquire ST164-D, which was isolated from a subsequent oral  
411 swab and a clinical sputum sample.

412

413 **Persistence of CRAB in the ICU results in clinically-relevant CRAB acquisition by**  
414 **patients**

415 Using the phylogenetic evidence described above, we sought to determine the derivation of  
416 each of the 13 CRAB clinical isolates collected over the course of this study, and therefore to  
417 identify the routes through which they might have been acquired by these 10 patients over the  
418 study period. Most (12/13) of the clinical isolates were GC2, and amongst these 10 were C25,  
419 one was C24, and one was C21. The remaining clinical isolate was ST164-D. Representatives  
420 of all four of these clusters were present in multiple patient and environmental samples prior  
421 to their appearance in clinical samples, but to avoid any ambiguity associated with small  
422 numbers of cgSNPs ( $\leq 4$ ), we focused on comparing identical (0 cgSNP) isolates when  
423 describing clinically-relevant CRAB acquisition in the ICU.

424

425 The GC2 C21 cluster was clearly introduced to the ICU by patient 200 (P200) (see above,

426 Figure 2), so its presence in a P200 clinical sample is indicative of acquisition elsewhere  
427 before the development of clinically-relevant symptoms requiring sputum sample collection  
428 in this ICU. The GC2 C24 isolate obtained from P172 was identical to isolates obtained from  
429 P172's first screening samples on arrival to the ICU, which might suggest that they carried  
430 C24 on arrival. However, because C24 was circulating in the ICU (see above), and identical  
431 isolates had been obtained from other patients and the ICU environment prior to the  
432 admission of P172, it is also possible that P172 acquired C24 in the ICU before their first  
433 screening samples were taken.

434

435 In the remaining eight cases, patients had been CRAB-negative at one or more sampling  
436 points prior to the development of symptoms that necessitated clinical sample collection. It  
437 therefore seems most parsimonious that all of these patients acquired CRAB in the ICU, and  
438 in three of these cases isolates identical to the clinical isolates had previously been isolated  
439 from the ICU environment. In the remaining five cases, the clinical isolates were not identical  
440 to any other isolates in the collection, but were highly similar to multiple other isolates,  
441 differing by  $\leq 4$  cgSNPs. We conclude that acquisition in the ICU was responsible for the  
442 majority (9 or 10/10) of CRAB found in clinically-relevant patient samples over the course of  
443 this study.

444

445

## 446 **Discussion**

447

448 This follow-up observational study has allowed us to assess the influence of bundled IPC  
449 interventions on an endemic ICU CRAB population, in a region where CRAB prevalence is  
450 highest globally.<sup>23</sup> The nature of bundled intervention strategies complicates assessments of

451 the impacts of individual IPC measures, and this was further complicated here by the time  
452 that passed between studies, as well as by the changes to ICU access and practice associated  
453 with responses to COVID-19. However, the unique timing of our studies either side of the  
454 emergence of COVID-19 also afforded us an opportunity to determine the joint impacts of  
455 the intervention strategies as well as the COVID-19 pandemic on antimicrobial resistance in  
456 *A. baumannii*.

457

458 The early and middle periods of the COVID-19 pandemic were associated with increased  
459 rates of antibiotic prescribing in China,<sup>24</sup> which may have augmented resistance levels in  
460 nosocomial bacterial populations. Increased prescription of  $\beta$ -lactam antibiotics (including  
461 carbapenems) and tigecycline, which have been reported across multiple studies,<sup>24</sup> are  
462 particularly concerning in the context of *A. baumannii*. The phenotype-agnostic approach to  
463 sampling in this study allowed us to determine that the majority (80.8%) of *A. baumannii* in  
464 this ICU were CRAB. We observed an increase in the magnitude of carbapenem resistance in  
465 this ICU, with MIC<sub>50</sub>/MIC<sub>90</sub> values doubling between our 2019 and 2021 studies. The  
466 increase in carbapenem resistance levels was driven by the emergence of ST164, which co-  
467 produced NDM-1 and OXA-23 carbapenemases. Despite the increase in carbapenem  
468 resistance, all isolates obtained in 2021 remained sensitive to colistin and tigecycline, though  
469 monitoring CRAB populations for resistance to these last-resort antibiotics should remain a  
470 high priority.

471

472 Following IPC interventions, we observed a decrease in the numbers of CRAB isolated from  
473 patients and from the ICU environment, and saw a reduction in both the total number of  
474 clinical isolates (from 19 in 2019 to 13 in 2021) and the number of patients from which  
475 clinical isolates were obtained: 12/140 patients (8.6%) in 2019, and 10/131 patients (7.6%) in

476 2021. However, IPC practices remained imperfect, with multiple examples of GC2 CRAB  
477 clusters being imported to the ICU before spreading to different bed units or rooms and being  
478 acquired by patients, highlighting the significant challenges associated with prevention of  
479 CRAB transmission in hospital wards once it has colonised the hospital environment. By  
480 using a highly-stringent 0-cgSNP cut-off when assessing putative transmission events over  
481 the course of this study, we have unambiguously implicated environmental persistence in the  
482 acquisition of CRAB by ICU patients and ultimately the development of nosocomial  
483 infections. New data presented here adds to our previous findings that suggested GC2 clusters  
484 were being imported to the ICU regularly from external sources. We hypothesise that other  
485 wards within this hospital, as well as patients transferred from other hospitals, serve as a  
486 source for incoming CRAB strains. If this is the case, hospital-wide IPC measures or highly  
487 stringent screening and isolation of CRAB-positive patients prior to ICU admission will be  
488 required to ultimately address CRAB imports.

489

490 A striking finding here was the reduction in prevalence of GC2 amongst CRAB isolates,  
491 falling from 99.5% in 2019 to 50.8% in 2021. The remainder of the 2021 CRAB population  
492 was comprised of a highly-clonal set of ST164 isolates that appear to have been diversifying  
493 *in situ* since mid-2020. This study has therefore added further context to the recent  
494 recognition of the emergence of ST164 as an international *A. baumannii* clone,<sup>20</sup> with our  
495 data specifically highlighting this clone's capacity to establish itself and persist in an ICU  
496 environment, even in direct competition with clusters of the highly successful GC2. While  
497 ST164 caused fewer infections than GC2 over this study period, its presence in one clinical  
498 specimen, and in clinical specimens collected previously in this ICU and elsewhere,<sup>19,20</sup> along  
499 with its high carbapenem resistance levels, suggest that it is a lineage that requires  
500 surveillance and further characterisation.

501

502 The increase in CRAB diversity between 2019 and 2021, including the appearance of ST164  
503 and the diversification of GC2, was likely a product of regular imports to the ICU over an  
504 approximately 20-month period. However, it would be interesting to determine whether IPC  
505 interventions have introduced new selective pressures and contributed to population  
506 turbulence. If so, these environmental conditions might select for fitter lineages that can  
507 better establish persistence in hospital environments. Environmental persistence might also  
508 be associated with a notable trade-off in virulence, as seen by the skew in isolates causing  
509 clinical infections here. Under such conditions, IPC measures might have differential effects  
510 at the strain level, and effective responses will require informed, dynamic IPC strategies.  
511 Experimental characterisation of diverse CRAB lineages will be needed to assess their  
512 variable ability to persist in hospital environments and ultimately infect patients. The GC2  
513 cluster C25, which was persistent in this ICU and prominent amongst clinical isolates over  
514 the course of this study (10/13; 76.9%), is an intriguing target for future laboratory studies  
515 that might address these questions.

## 516 **Acknowledgements**

517 This work was undertaken as part of the DETECTIVE research project funded by the  
518 Medical Research Council (MR/S013660/1), and the National Natural Science Foundation of  
519 China (U22A20338, 32270183, 81861138054, 32011530116). W.v.S was also supported by a  
520 Wolfson Research Merit Award (WM160092). AM is also supported by the National Institute  
521 for Health and Care Research (NIHR) Birmingham Biomedical Research Centre  
522 (NIHR203326).

523

## 524 **References**

- 525 1. Bergogne-Bérézin E, Towner KJ. *Acinetobacter* spp. as nosocomial pathogens:  
526 microbiological, clinical, and epidemiological features. Clin Microbiol Rev. 1996.
- 527 2. Müller C, Reuter S, Wille J, Xanthopoulou K, Stefanik D, Grundmann H, et al. A global  
528 view on carbapenem-resistant *Acinetobacter baumannii*. mBio. 2023.
- 529 3. Hamidian M, Nigro SJ. Emergence, molecular mechanisms and global spread of  
530 carbapenem-resistant *Acinetobacter baumannii*. Microb Genomics. 2019.
- 531 4. Dijkshoorn L, Nemec A, Seifert H. An increasing threat in hospitals: multidrug-resistant  
532 *Acinetobacter baumannii*. Nat Rev Microbiol. 2007.
- 533 5. Tacconelli E, Carrara E, Savoldi A, Harbarth S, Mendelson M, Monnet DL, et al.  
534 Discovery, research, and development of new antibiotics: the WHO priority list of  
535 antibiotic-resistant bacteria and tuberculosis. Lancet Infect Dis. 2018.
- 536 6. Roberts LW, Forde BM, Hurst T, Ling W, Nimmo GR, Bergh H, et al. Genomic  
537 surveillance, characterization and intervention of a polymicrobial multidrug-resistant  
538 outbreak in critical care. Microb Genomics. 2021.
- 539 7. Lewis T, Loman NJ, Bingle L, Jumaa P, Weinstock GM, Mortiboy D, et al. High-  
540 throughput whole-genome sequencing to dissect the epidemiology of *Acinetobacter*  
541 *baumannii* isolates from a hospital outbreak. J Hosp Infect. 2010.
- 542 8. Shenoy ES, Pierce VM, Sater MRA, Pangestu FK, Herriott IC, Anahtar MN, et al.  
543 Community-acquired in name only: A cluster of carbapenem-resistant *Acinetobacter*  
544 *baumannii* in a burn intensive care unit and beyond. Infect Control Hosp Epidemiol.  
545 2020.
- 546 9. Schultz MB, Pham Thanh D, Tran Do Hoan N, Wick RR, Ingle DJ, Hawkey J, et al.  
547 Repeated local emergence of carbapenem-resistant *Acinetobacter baumannii* in a single  
548 hospital ward. Microb Genomics. 2016.
- 549 10. Doughty EL, Liu H, Moran RA, Hua X, Ba X, Guo F, et al. Endemicity and  
550 diversification of carbapenem-resistant *Acinetobacter baumannii* in an intensive care  
551 unit. Lancet Reg Health West Pac. 2023.
- 552 11. Diancourt L, Passet V, Nemec A, Dijkshoorn L, Brisse S. The population structure of  
553 *Acinetobacter baumannii*: expanding multiresistant clones from an ancestral susceptible  
554 genetic pool. PLoS ONE. 2010.
- 555 12. Bartual SG, Seifert H, Hippler C, Wisplinghoff H, Rodriguez-Valera F. Development of a  
556 multilocus sequence typing scheme for characterization of clinical isolates of  
557 *Acinetobacter baumannii*. J Clin Microbiol. 2005.
- 558 13. Wyres KL, Cahill SM, Holt KE, Hall RM, Kenyon JJ. Identification of *Acinetobacter*  
559 *baumannii* loci for capsular polysaccharide (KL) and lipooligosaccharide outer core  
560 (OCL) synthesis in genome assemblies using curated reference databases compatible  
561 with Kaptive. Microb Genomics. 2020.
- 562 14. Feldgarden M, Brover V, Haft DH, Prasad AB, Slotta DJ, Tolstoy I, et al. Validating the  
563 AMRFinder tool and resistance gene database by using antimicrobial resistance

- 564 genotype-phenotype correlations in a collection of isolates. *Antimicrob Agents*  
565 *Chemother.* 2019.
- 566 15. Lam MMC, Koong J, Holt KE, Hall RM, Hamidian M. Detection and typing of plasmids  
567 in *Acinetobacter baumannii* using *rep* genes encoding replication initiation proteins.  
568 *Microbiol Spectr.* 2023.
- 569 16. Croucher NJ, Page AJ, Connor TR, Delaney AJ, Keane JA, Bentley SD, et al. Rapid  
570 phylogenetic analysis of large samples of recombinant bacterial whole genome  
571 sequences using Gubbins. *Nucleic Acids Res.* 2015.
- 572 17. To TH, Jung M, Lycett S, Gascuel O. Fast dating using least-squares criteria and  
573 algorithms. *Syst Biol.* 2016.
- 574 18. Minh BQ, Schmidt HA, Chernomor O, Schrempf D, Woodhams MD, von Haeseler A, et  
575 al. IQ-TREE 2: New models and efficient methods for phylogenetic inference in the  
576 genomic era. *Mol Biol Evol.* 2020.
- 577 19. Zhao F, Liu H, Yao Y, Zhang L, Zhou Z, Leptihn S, et al. Description of a rare  
578 pyomelanin-producing carbapenem-resistant *Acinetobacter baumannii* strain  
579 coharboring chromosomal OXA-23 and NDM-1. *Microbiol Spectr.* 2022.
- 580 20. Hansen F, Porsbo LJ, Frandsen TH, Kaygisiz ANS, Roer L, Henius AE, et al.  
581 Characterisation of carbapenemase-producing *Acinetobacter baumannii* isolates from  
582 Danish patients 2014-2021: detection of a new international clone - IC11. *Int J*  
583 *Antimicrob Agents.* 2023.
- 584 21. Hua X, Moran RA, Xu Q, He J, Fang Y, Zhang L, et al. Acquisition of a genomic  
585 resistance island (AbGRI5) from global clone 2 through homologous recombination in a  
586 clinical *Acinetobacter baumannii* isolate. *J Antimicrob Chemother.* 2021.
- 587 22. Mann R, Rafei R, Gunawan C, Harmer CJ, Hamidian M. Variants of Tn6924, a novel  
588 Tn7 family transposon carrying the *bla*<sub>NDM</sub> metallo- $\beta$ -lactamase and 14 copies of the  
589 *aphA6* amikacin resistance genes found in *Acinetobacter baumannii*. *Microbiol Spectr.*  
590 2022.
- 591 23. Oldenkamp R, Schultsz C, Mancini E, Cappuccio A. Filling the gaps in the global  
592 prevalence map of clinical antimicrobial resistance. *Proc Natl Acad Sci USA.* 2021.
- 593 24. Cong W, Cheng HY, Stuart B, Liu B, Tang Y, Wang Y, et al. Prevalence of antibiotic  
594 prescribing in COVID-19 patients in China and other low- and middle-income countries  
595 during the pandemic (December 2019-March 2021): a systematic review and meta-  
596 analysis. *J Antimicrob Chemother.* 2023.
- 597



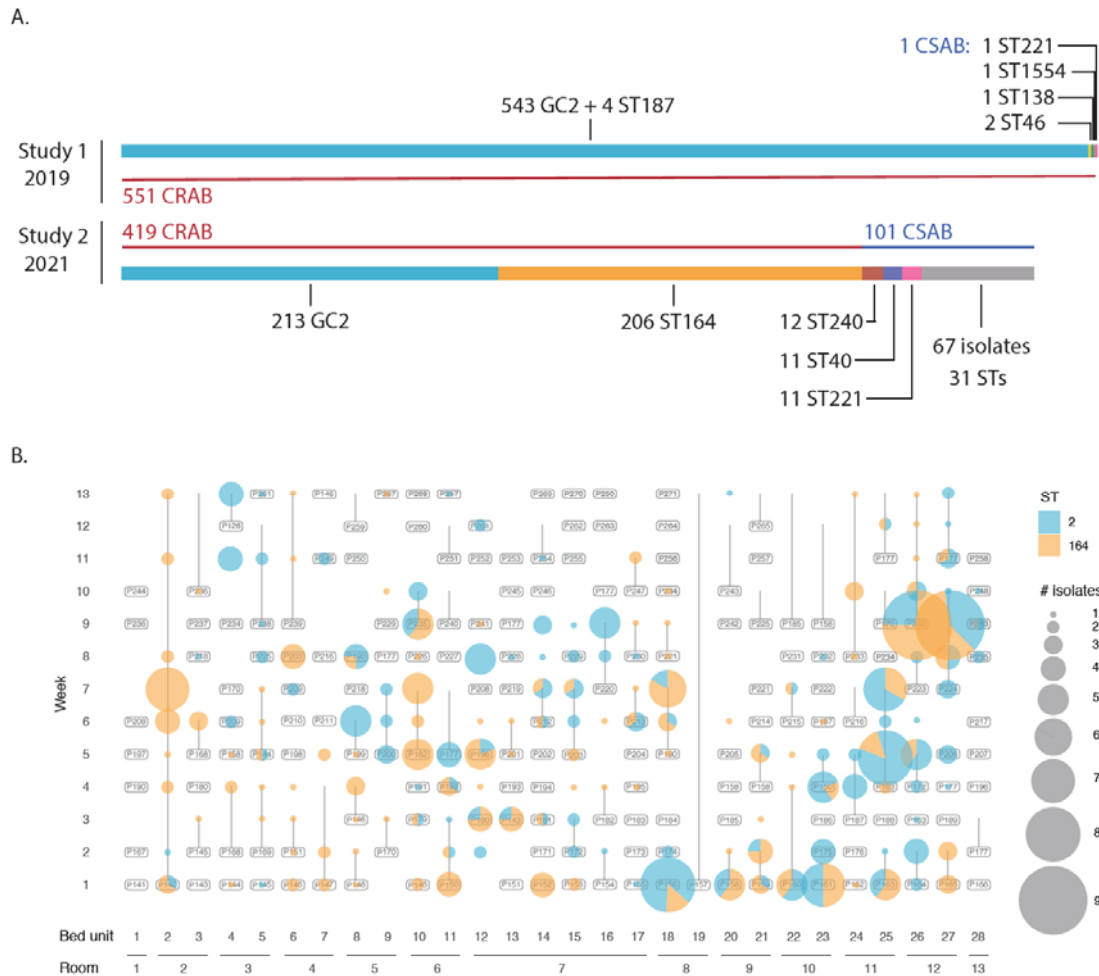

598

599 **Figure 1: The ICU *A. baumannii* population.** A) Comparison of the *A. baumannii*  
600 populations collected in this ICU over the initial (2019) and follow-up (2021) study periods.  
601 Horizontal bars are proportional to the number of isolates of given sequence types (STs),  
602 which are labelled and represented by different colours. Thinner horizontal lines and labels  
603 indicate whether isolates were carbapenem-resistant (CRAB; red) or carbapenem-sensitive  
604 (CSAB; blue). B) Overview of the spatiotemporal distribution of GC2/ST2 (blue) and ST164  
605 (orange) isolates over the course of the 2021 study. Bed unit and room numbers are indicated  
606 on the horizontal axis, and study week numbers on the vertical axis. The sizes of circles  
607 correspond to the number of isolates collected from each patient/bed unit at each sampling  
608 timepoint.  
609

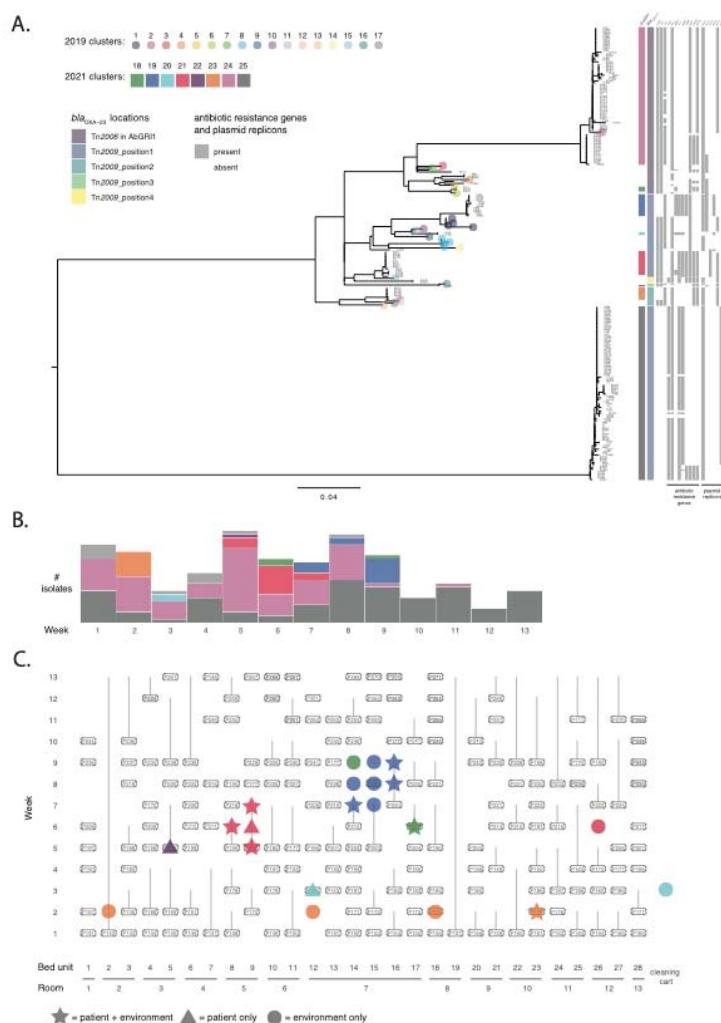

610

611 **Figure 2: The ICU GC2 population observed in this study.** A) Core-gene phylogeny (left)

612 and cluster characteristics (right). Reference genomes for clusters obtained in the 2019 study

613 are indicated by coloured circles at branch tips. Cluster designations from this study are

614 indicated by coloured boxes to the right of the phylogeny, along with boxes shaded as

615 outlined in the key to the left of the figure. B) Temporal distribution of GC2 clusters over the

616 course of this study. For each study week, columns are divided according to the numbers of

617 isolates of each GC2 cluster that were obtained, with colours corresponding to the key in part

618 A. C) Spatiotemporal distribution of transient GC2 clusters introduced by patients over the

619 course of this study. The meaning of shapes is outlined in the key below, and colours

620 correspond to those in the key in part A.

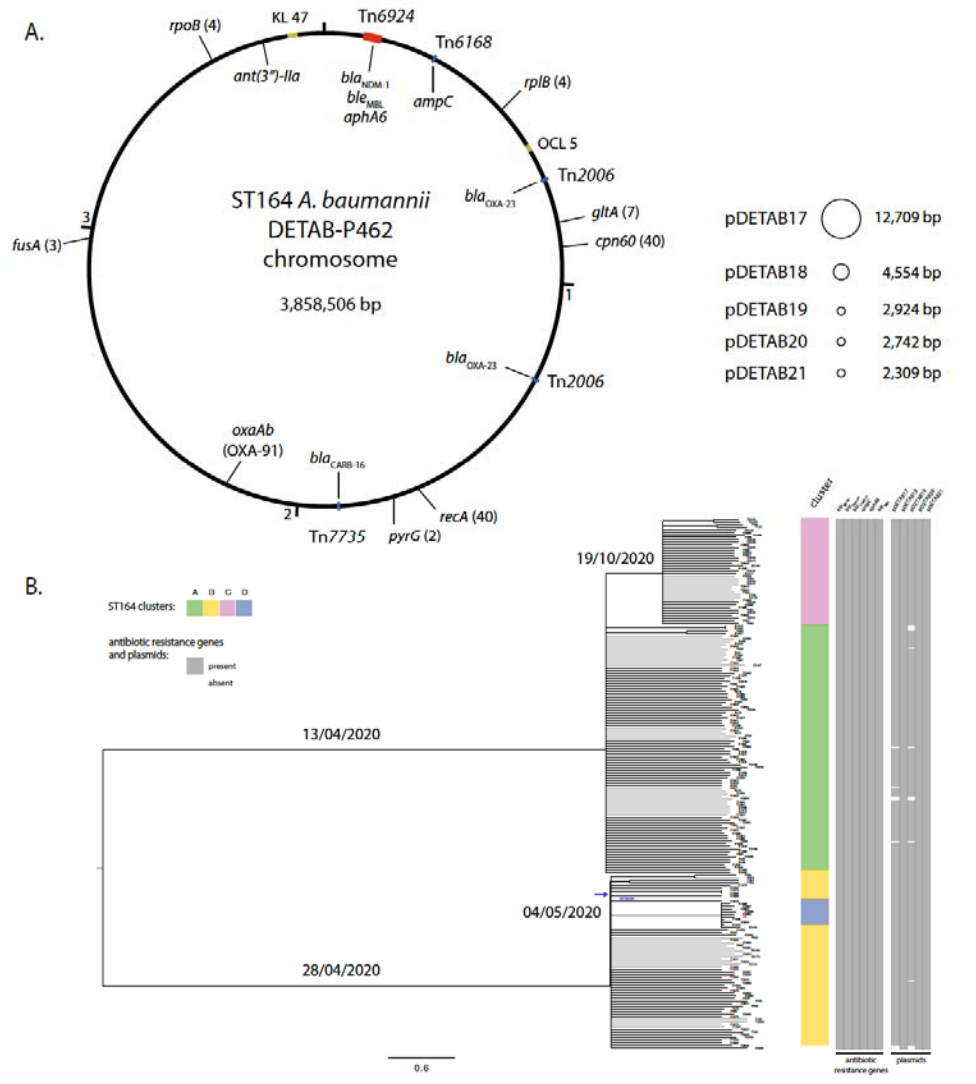

621

622 **Figure 3: Genomic characteristics of ST164 *A. baumannii*.** A) Schematic overview of the  
 623 genome of ST164 isolate DETAB-P462. The chromosome is shown as a large circle with the  
 624 locations of antibiotic resistance genes, MLST alleles, capsule (K) and outer core (OC) loci  
 625 indicated. To the right, plasmids pDETAB17-21 and their sizes are shown (not to scale). B)  
 626 Time-dated phylogeny of the ST164 population examined in this study. Prominent branch  
 627 dates are labelled, and the colours to the right of the phylogeny reflect ST164 clusters or the  
 628 presence of antibiotic resistance genes and plasmids as outlined in the key. The blue arrow  
 629 indicates the position of DETAB-R21, the reference isolated that was isolated in this ICU in  
 630 early 2021.

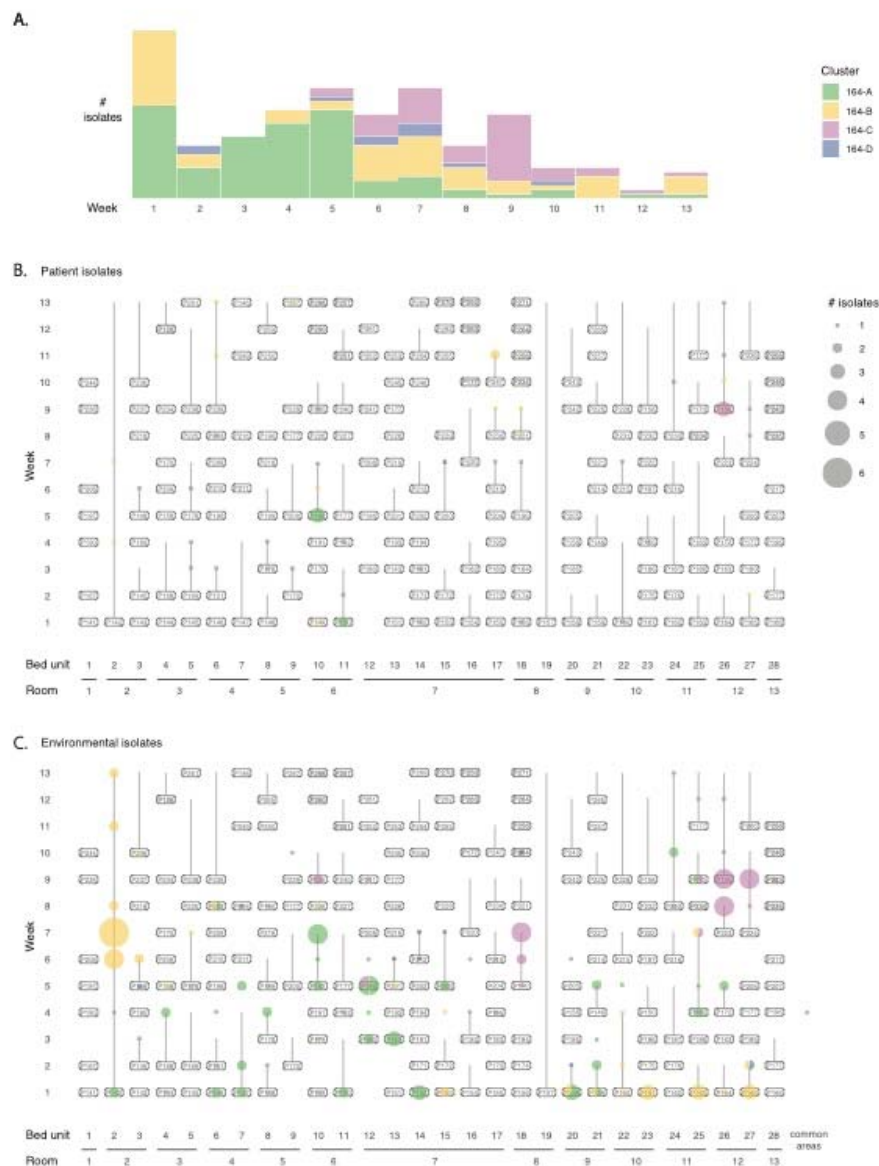

631

632 **Figure 4: Distribution of ST164 in the ICU.** A) Temporal distribution of ST164 clusters  
633 over the course of this study. For each study week, columns are divided according to the  
634 numbers of isolates of each ST164 cluster that were obtained, with colours corresponding to  
635 the key. Spatiotemporal distribution of ST164 clusters isolated from patients (B) and the ICU  
636 environment (C). Colours correspond to the key in part A, and the sizes of bubbles to the  
637 numbers of isolates indicated by the key in part B.
